# Supplementary material for: Oligosaccharides derived from Lycium barbarum ameliorate glycolipid metabolism and modulate the gut microbiota community and the faecal metabolites in a type 2 diabetes mouse model: metabolomic bioinformatic analysis
Source: Royal Society of Chemistry journal article supplement (doi:10.1039/d1fo02667d), 2022-01-01
Supplement: d1fo02667d1.pdf [file d1fo02667d1.pdf]

## Supporting Information

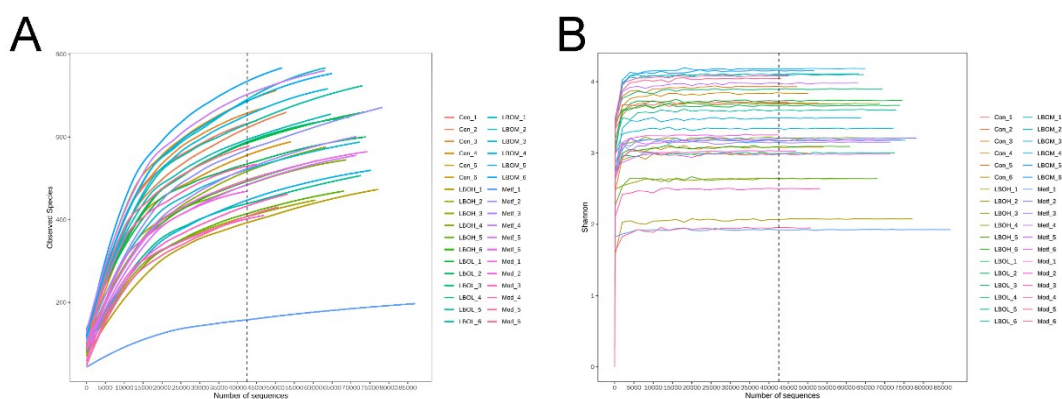

5 **Figure S1. (A)** Rarefaction Curve. Abscissa: number of qualitatively sequence drawn  
6 at random; ordinate: number of observed OTUs. The flatter the curve, the more  
7 reasonable the amount of sequencing data, and more data volumes will only generate  
8 a small number of new OTUs. **(B)** Shannon Curve. The flatter the curve, the larger  
9 amount of sequencing data is enough to reflect the sample's vast majority of microbial  
10 information.

11

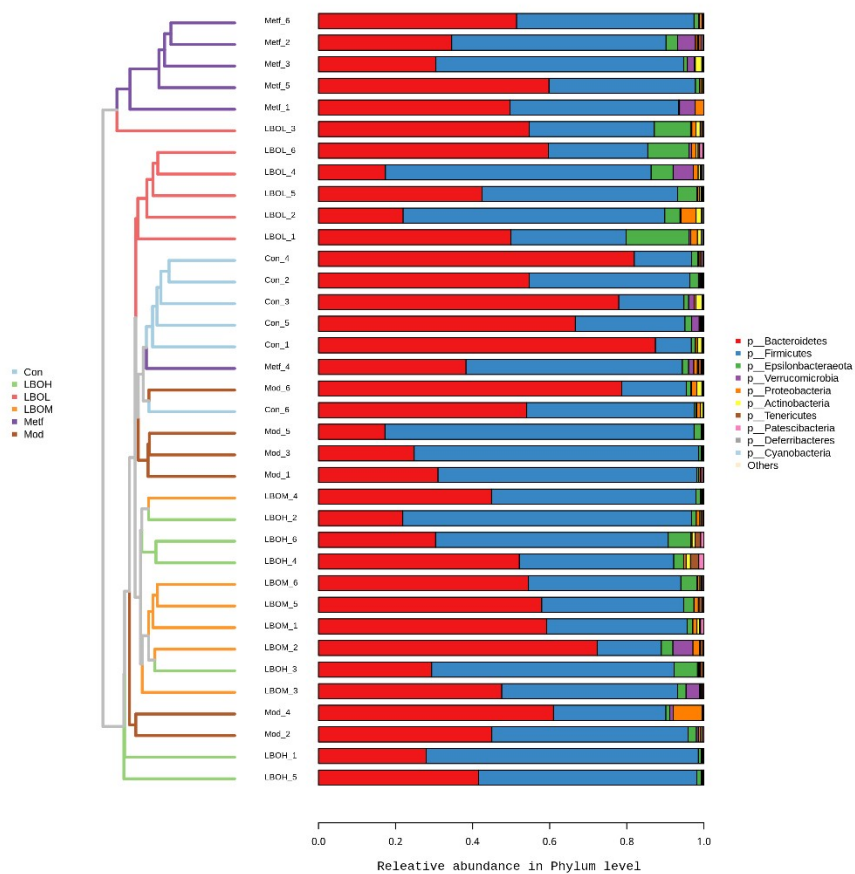

12

13 **Figure S2.** UPGMA clustering tree based on unweighted unifrac distances and  
 14 histograms of community structure at the phylum level.

15

16

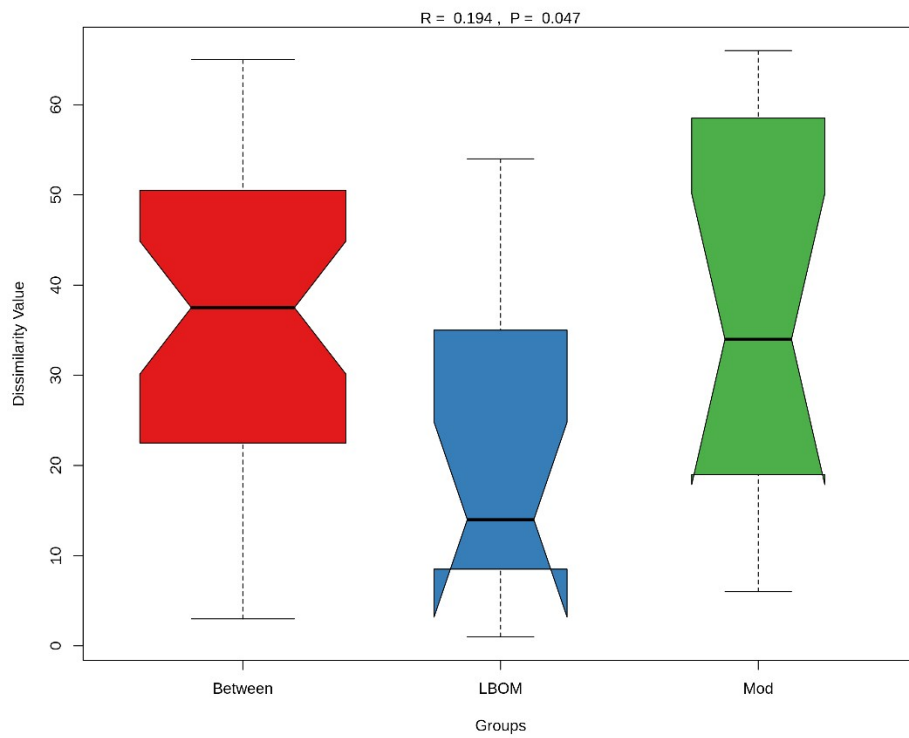

17

18 **Figure S3.** Boxplots represent the differences between and within the LBO-M and the  
 19 Mod ( $P < 0.05$ ).

20

21

22

23

24

25

26

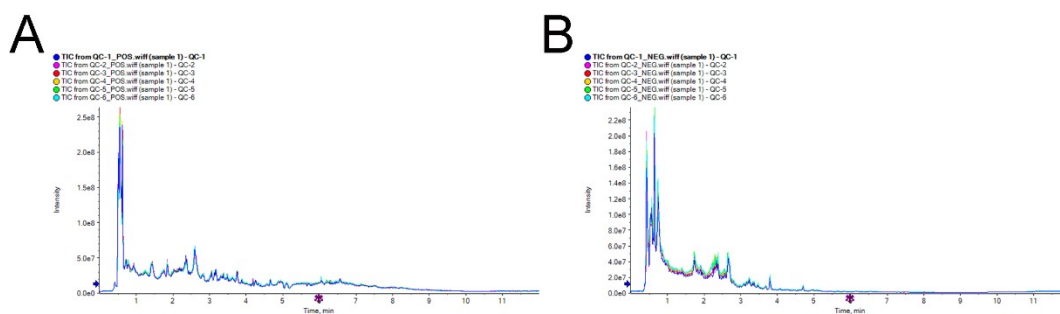

27

28 **Figure S4.** Overlapping spectra of TIC diagrams of QC samples in **(A)** the positive  
 29 and **(B)** the negative ion modes.

30

31
